# Supplementary material for: Overlap of NatA and IAP substrates implicates N-terminal acetylation in protein stabilization
Source: PubMed Central journal article supplement — Sci Adv. 2021 Jan 15;7(3):eabc8590. doi: 10.1126/sciadv.abc8590 (PMC7810383; doi:10.1126/sciadv.abc8590), 2021-01-15
Supplement: abc8590_Table_S3.pdf [file abc8590_Table_S3.pdf]

| Gene Name | BIR domain<br>Peptide (KKK-FITC) | BIRC3 <sup>BIR3</sup><br>(K <sub>d</sub> -value nM) | XIAP <sup>Linker-BIR2-BIR3</sup><br>(K <sub>d</sub> -value nM) | XIAP <sup>BIR1</sup><br>(K <sub>d</sub> -value nM) |
|-----------|----------------------------------|-----------------------------------------------------|----------------------------------------------------------------|----------------------------------------------------|
| DIABLO    | AVPIAQKSEP-                      | <b>270 +/- 30</b>                                   | <b>1350 +/- 50</b>                                             | No binding                                         |
| DIABLO    | Ac – AVPIAQKSEP-                 | No binding                                          | No binding                                                     | n.d.                                               |
| CASP9     | ATPFQEGLRTF-                     | <b>170 +/- 15</b>                                   | <b>820 +/- 50</b>                                              | No binding                                         |
| CASP9     | Ac – ATPFQEGLRTF-                | No binding                                          | No binding                                                     | n.d.                                               |
| COMMD10   | AVPAALILRE-                      | <b>250 +/- 12</b>                                   | <b>3000 +/- 200</b>                                            | No binding                                         |
| COMMD10   | Ac – AVPAALILRE-                 | No binding                                          | No binding                                                     | n.d.                                               |
| NIT1      | AISSSSCELPLVAV-                  | <b>2800 +/- 200</b>                                 | <b>2000 +/- 80</b>                                             | No binding                                         |
| NIT1      | Ac – AISSSSCELPLVAV-             | No binding                                          | No binding                                                     | n.d.                                               |
| CDC20     | AQFAFESDLHSLQL-                  | <b>9200 +/- 1400</b>                                | <b>15000 +/- 3000</b>                                          | No binding                                         |
| CDC20     | Ac – AQFAFESDLHSLQL-             | No binding                                          | No binding                                                     | n.d.                                               |

Mueller et al.  
Table S3
